# Supplementary material for: The genetic and phenotypic correlates of mtDNA copy number in a multi-ancestry cohort
Source: PubMed Central journal article supplement (PMC10225932; doi:10.1016/j.xhgg.2023.100202), 2023-05-09
Supplement: mmc1.pdf [file mmc1.pdf]

**HGGA, Volume 4**

**Supplemental information**

**The genetic and phenotypic correlates  
of mtDNA copy number in a multi-ancestry cohort**

**Arslan A. Zaidi, Anurag Verma, Colleen Morse, Penn Medicine BioBank, Marylyn D. Ritchie, and Iain Mathieson**

## 518 References

- 519 1. Rath, S., Sharma, R., *et al.* MitoCarta3.0: an updated mitochondrial proteome now with sub-  
520 organelle localization and pathway annotations. *Nucleic Acids Research* **49**, D1541–D1547 (D1  
521 2021).
- 522 2. Taylor, R. W. & Turnbull, D. M. Mitochondrial DNA mutations in human disease. *Nature Reviews*  
523 *Genetics* **6**, 389–402 (5 2005).
- 524 3. Chinnery, P. F. Primary Mitochondrial Disorders Overview. *GeneReviews*® (2021).
- 525 4. D’Erchia, A. M., Atlante, A., *et al.* Tissue-specific mtDNA abundance from exome data and its  
526 correlation with mitochondrial transcription, mass and respiratory activity. *Mitochondrion* **20**, 13–  
527 21 (2015).
- 528 5. Bentlage, H. A. & Attardi, G. Relationship of Genotype to Phenotype in Fibroblast-derived Trans-  
529 mitochondrial Cell Lines Carrying the 3243 Mutation Associated with the Melas Encephalomy-  
530 opathy: Shift towards Mutant Genotype and Role of mtDNA Copy Number. *Human Molecular*  
531 *Genetics* **5**, 197–205 (2 1996).
- 532 6. Lee, S. R., Heo, H. J., *et al.* Low abundance of mitochondrial DNA changes mitochondrial sta-  
533 tus and renders cells resistant to serum starvation and sodium nitroprusside insult. *Cell Biology*  
534 *International* **39**, 865–872 (7 2015).
- 535 7. Rausser, S., Trumpff, C., *et al.* Mitochondrial phenotypes in purified human immune cell subtypes  
536 and cell mixtures. *eLife* **10** (2021).
- 537 8. Picard, M. Blood mitochondrial DNA copy number: What are we counting? *Mitochondrion* **60**,  
538 1–11 (2021).
- 539 9. Filograna, R., Mennuni, M., *et al.* Mitochondrial DNA copy number in human disease: the more  
540 the better? *FEBS Letters* **595**, 976–1002 (8 2021).
- 541 10. Hägg, S., Jylhävä, J., *et al.* Deciphering the genetic and epidemiological landscape of mitochondrial  
542 DNA abundance. *Human Genetics* **140**, 849–861 (2021).
- 543 11. Longchamps, R. J., Yang, S. Y., *et al.* Genome-wide analysis of mitochondrial DNA copy number re-  
544 veals loci implicated in nucleotide metabolism, platelet activation, and megakaryocyte proliferation.  
545 *Human Genetics* **141**, 127–146 (2022).
- 546 12. Knez, J., Winckelmans, E., *et al.* Correlates of Peripheral Blood Mitochondrial DNA Content in a  
547 General Population. *American Journal of Epidemiology* **183**, 138–146 (2015).
- 548 13. Howes, R. E., Patil, A. P., *et al.* The global distribution of the Duffy blood group. *Nature Commu-  
549 nications* *2011 2:1* **2**, 1–10 (1 2011).
- 550 14. Reich, D., Nalls, M. A., *et al.* Reduced Neutrophil Count in People of African Descent Is Due To  
551 a Regulatory Variant in the Duffy Antigen Receptor for Chemokines Gene. *PLoS Genetics* **5** (ed  
552 Visscher, P. M.) e1000360 (2009).
- 553 15. Ng, Y. S. & Turnbull, D. M. Mitochondrial disease: genetics and management. *Journal of Neurology*  
554 **263**, 179–191 (1 2016).

- 555 16. Parikh, S., Goldstein, A., *et al.* Diagnosis and management of mitochondrial disease: A consensus  
556 statement from the Mitochondrial Medicine Society. *Genetics in Medicine* **17**, 689–701 (9 2015).
- 557 17. Suomalainen, A. & Battersby, B. J. Mitochondrial diseases: The contribution of organelle stress  
558 responses to pathology. *Nature Reviews Molecular Cell Biology* **19**, 77–92 (2 2018).
- 559 18. Russell, O. M., Gorman, G. S., *et al.* Mitochondrial Diseases: Hope for the Future. *Cell* **181**, 168–  
560 188 (1 2020).
- 561 19. Agarwal, S., Fulgoni, V. L., *et al.* Assessing alcohol intake & its dosedependent effects on liver  
562 enzymes by 24-h recall and questionnaire using NHANES 2001-2010 data. *Nutrition Journal* **15**,  
563 1–12 (1 2016).
- 564 20. Mansouri, A., Gaou, I., *et al.* An alcoholic binge causes massive degradation of hepatic mitochondrial  
565 DNA in mice. *Gastroenterology* **117**, 181–190 (1 1999).
- 566 21. Zhang, Y., Guallar, E., *et al.* Association between mitochondrial DNA copy number and sudden  
567 cardiac death: Findings from the Atherosclerosis Risk in Communities study (ARIC). *European*  
568 *Heart Journal* **38**, 3443–3448 (2017).
- 569 22. Wiersma, M., van Marion, D. M., *et al.* Cell-Free Circulating Mitochondrial DNA: A Potential  
570 Blood-Based Marker for Atrial Fibrillation. *Cells* **9** (5 2020).
- 571 23. Ashar, F. N., Zhang, Y., *et al.* Association of mitochondrial DNA copy number with cardiovascular  
572 disease. *JAMA Cardiology* **2**, 1247–1255 (2017).
- 573 24. El-Hattab, A. W. & Scaglia, F. Mitochondrial DNA Depletion Syndromes: Review and Updates of  
574 Genetic Basis, Manifestations, and Therapeutic Options. *Neurotherapeutics* **10**, 186–198 (2 2013).
- 575 25. Yang, J., Lee, S. H., *et al.* GCTA: a tool for genome-wide complex trait analysis. *American journal*  
576 *of human genetics* **88**, 76–82 (1 2011).
- 577 26. Genovese, G., Friedman, D. J., *et al.* Association of trypanolytic ApoL1 variants with kidney disease  
578 in African Americans. *Science* **329**, 841–5 (2010).
- 579 27. Limou, S., Nelson, G. W., *et al.* APOL1 kidney risk alleles: population genetics and disease associ-  
580 ations. *Adv Chronic Kidney Dis* **21**, 426–33 (2014).
- 581 28. Chen, M. H., Raffield, L. M., *et al.* Trans-ethnic and Ancestry-Specific Blood-Cell Genetics in  
582 746,667 Individuals from 5 Global Populations. *Cell* **182**, 1198–1213.e14 (5 2020).
- 583 29. Cai, N., Li, Y., *et al.* Genetic Control over mtDNA and Its Relationship to Major Depressive  
584 Disorder. *Current Biology* **25**, 3170–3177 (24 2015).
- 585 30. Chong, M., Mohammadi-Shemirani, P., *et al.* GWAS and ExWAS of blood Mitochondrial DNA  
586 copy number identifies 71 loci and highlights a potential causal role in dementia. *eLife* **11** (2022).
- 587 31. Zaidi, A. A. & Makova, K. D. Investigating mitonuclear interactions in human admixed populations.  
588 *Nature Ecology and Evolution* **3**, 213–222 (2019).
- 589 32. Crawford, N., Prendergast, D., *et al.* Divergent Patterns of Mitochondrial and Nuclear Ancestry  
590 Are Associated with the Risk for Preterm Birth. *The Journal of Pediatrics* **194**, 40–46.e4 (2018).

- 591 33. Udler, M. S., Nadkarni, G. N., *et al.* Effect of genetic African ancestry on EGFR and kidney disease.  
592 *Journal of the American Society of Nephrology* **26**, 1682–1692 (2015).
- 593 34. Zilbermint, M., Hannah-Shmouni, F., *et al.* Genetics of Hypertension in African Americans and  
594 Others of African Descent. *International Journal of Molecular Sciences* **20**, 1081 (2019).
- 595 35. Samokhvalov, A. V., Irving, H., *et al.* Alcohol consumption, unprovoked seizures, and epilepsy: A  
596 systematic review and meta-analysis. *Epilepsia* **51**, 1177–1184 (7 2010).
- 597 36. Wu, L. T., Woody, G. E., *et al.* Racial/Ethnic Variations in Substance-Related Disorders Among  
598 Adolescents in the United States. *Archives of General Psychiatry* **68**, 1176–1185 (11 2011).
- 599 37. Holmbeck, M. A., Donner, J. R., *et al.* A Drosophila model for mito-nuclear diseases generated  
600 by an incompatible interaction between tRNA and tRNA synthetase. *DMM Disease Models and*  
601 *Mechanisms* **8**, 843–854 (8 2015).
- 602 38. Burton, R. S., Ellison, C. K., *et al.* The sorry state of F2 hybrids: consequences of rapid mitochon-  
603 drial DNA evolution in allopatric populations. *The American naturalist* **168**, S14–S24 (2006).
- 604 39. Meiklejohn, C. D., Holmbeck, M. A., *et al.* An Incompatibility between a Mitochondrial tRNA and  
605 Its Nuclear-Encoded tRNA Synthetase Compromises Development and Fitness in Drosophila. *PLoS*  
606 *Genetics* **9** (ed Payseur, B. A.) e1003238 (1 2013).
- 607 40. Reinhardt, K., Dowling, D. K., *et al.* Medicine. Mitochondrial replacement, evolution, and the clinic.  
608 *Science* **341**, 1345–6 (2013).
- 609 41. Chou, J.-Y. & Leu, J.-Y. The Red Queen in mitochondria: cyto-nuclear co-evolution, hybrid break-  
610 down and human disease. *Frontiers in Genetics* **6**, 187 (2015).
- 611 42. Morrow, E. H., Reinhardt, K., *et al.* Risks inherent to mitochondrial replacement. *EMBO reports*  
612 **16**, 541–544 (5 2015).
- 613 43. Claiborne, A. B., English, R. A., *et al.* Finding an ethical path forward for mitochondrial replace-  
614 ment. *Science* **351**, 668–670 (6274 2016).
- 615 44. Eyre-Walker, A. Mitochondrial Replacement Therapy: Are Mito-nuclear Interactions Likely To Be  
616 a Problem? *Genetics* **205**, 1365–1372 (4 2017).
- 617 45. Trumpff, C., Michelson, J., *et al.* Stress and circulating cell-free mitochondrial DNA: A systematic  
618 review of human studies, physiological considerations, and technical recommendations. *Mitochon-*  
619 *drion* **59** (2021).
- 620 46. Denny, J. C., Ritchie, M. D., *et al.* PheWAS: demonstrating the feasibility of a phenome-wide scan  
621 to discover gene–disease associations. *Bioinformatics* **26**, 1205–1210 (9 2010).
- 622 47. Bastarache, L. Using Phecodes for Research with the Electronic Health Record: From PheWAS to  
623 PheRS. *Annual review of biomedical data science* **4**, 1–19 (2021).
- 624 48. Venables, W. N. & Ripley, B. D. *Modern Applied Statistics with S* Fourth. ISBN 0-387-95457-0  
625 (Springer, New York, 2002).
- 626 49. R Core Team. *R: A Language and Environment for Statistical Computing* R Foundation for Sta-  
627 tistical Computing (Vienna, Austria, 2021).

- 628 50. Li, H. A statistical framework for SNP calling, mutation discovery, association mapping and popu-  
629 lation genetical parameter estimation from sequencing data. *Bioinformatics* **27**, 2987 (21 2011).
- 630 51. García-Olivares, V., Muñoz-Barrera, A., *et al.* A benchmarking of human mitochondrial DNA hap-  
631 logroup classifiers from whole-genome and whole-exome sequence data. *Scientific Reports* **11**, 1–11  
632 (2021).
- 633 52. Weissensteiner, H., Pacher, D., *et al.* HaploGrep 2: mitochondrial haplogroup classification in the  
634 era of high-throughput sequencing. *Nucleic Acids Research* **44**, W58–W63 (W1 2016).
- 635 53. Fast two-stage phasing of large-scale sequence data. *American Journal of Human Genetics* **108**,  
636 1880–1890 (2021).
- 637 54. Maples, B. K., Gravel, S., *et al.* RFMix: a discriminative modeling approach for rapid and robust  
638 local-ancestry inference. *American journal of human genetics* **93**, 278–88 (2013).
- 639 55. Auton, A., Abecasis, G. R., *et al.* A global reference for human genetic variation. *Nature* *2015*  
640 *526:7571* **526**, 68–74 (7571 2015).
- 641 56. Alexander, D. H., Novembre, J., *et al.* Fast model-based estimation of ancestry in unrelated indi-  
642 viduals. *Genome research* **19**, 1655–64 (2009).
- 643 57. Das, S., Forer, L., *et al.* Next-generation genotype imputation service and methods. *Nature Genetics*  
644 **48**, 1284–1287 (10 2016).
- 645 58. Chang, C. C., Chow, C. C., *et al.* Second-generation PLINK: rising to the challenge of larger and  
646 richer datasets. *GigaScience* **4**, s13742–015–0047–8 (1 2015).
- 647 59. Shrinker, D., Adeyemo, A., *et al.* Joint Ancestry and Association Testing in Admixed Individuals.  
648 *PLOS Computational Biology* **7**, e1002325 (12 2011).
- 649 60. Plummer, M., Best, N., *et al.* CODA: Convergence Diagnosis and Output Analysis for MCMC. *R*  
650 *News* **6**, 7–11 (2006).

## 651 **Supplementary material**

### 652 **Penn Medicine Biobank Team and Contributions**

#### 653 **Leadership**

654 Daniel J. Rader, M.D., Marylyn D. Ritchie, Ph.D., Michael D. Feldman M.D.

655 Contribution: Contributed to securing funding, study design and oversight.

#### 656 **Patient Recruitment and Regulatory Oversight**

657 JoEllen Weaver, Nawar Naseer, Ph.D., M.P.H., Afiya Poindexter, Ashlei Brock, Khadijah Hu-Sain, Yi-An

658 Ko

659 Contributions: JW manages patient recruitment and regulatory oversight of study. NN manages partic-  
660 ipant engagement, assists with regulatory oversight, and researcher access. AP, AB, KH, YK perform  
661 recruitment and enrollment of study participants.

#### 662 **Lab Operations**

663 JoEllen Weaver, Meghan Livingstone, Fred Vadivieso, Ashley Kloter, Stephanie DerOhannessian, Teo

664 Tran, Linda Morrel, Ned Haubein, Joseph Dunn

665 Contribution: JW, ML, FV, SD conduct oversight of lab operations. ML, FV, AK, SD, TT, LM per-  
666 form sample processing. NH, JD are responsible for sample tracking and the laboratory information  
667 management system.

#### 668 **Clinical Informatics**

669 Anurag Verma, Ph.D., Colleen Morse, P.T, D.P.T, M.S, Marjorie Risman, M.S., Renae Judy, B.S.

670 Contribution: All authors contributed to the development and validation of clinical phenotypes used to  
671 identify study subjects and (when applicable) controls.

#### 672 **Genome Informatics**

673 Anurag Verma Ph.D., Shefali S. Verma, Ph.D., Yuki Bradford, M.S., Scott Dudek, M.S., Theodore  
674 Drivas, M.D., PH.D.

675 Contribution: A.V., S.S.V. are responsible for the analysis, design, and infrastructure needed to quality  
676 control genotype and exome data. Y.B. performs the analysis. T.D. and A.V. provides variant and gene  
677 annotations and their functional interpretation of variants.

A) Model:  $\text{lrmtCN} \sim \text{sex} + \text{age} + \text{age}^2 + \text{gPCs1-20}$

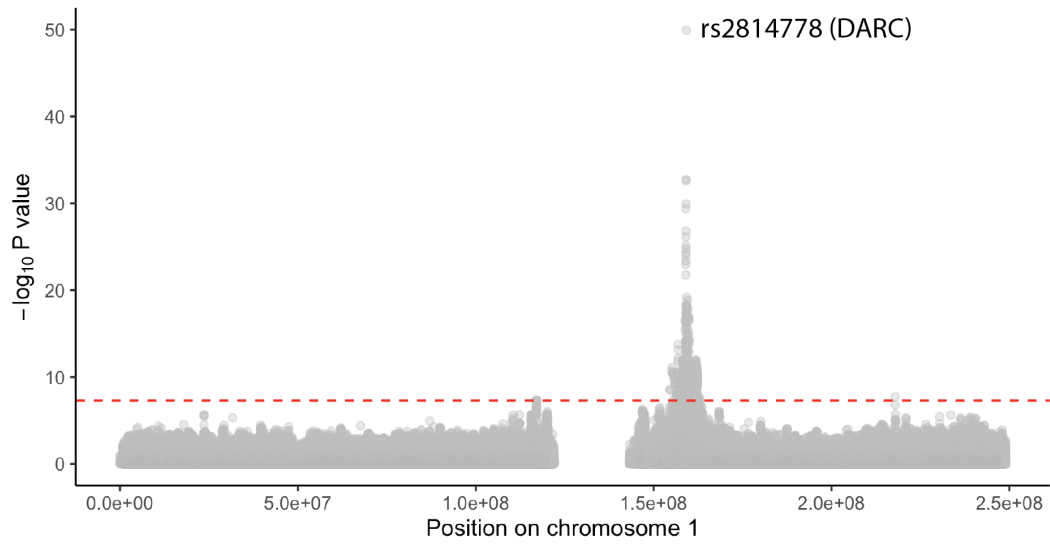

B) Model:  $\text{rlrmtCN} \sim \text{gPCs1-20}$

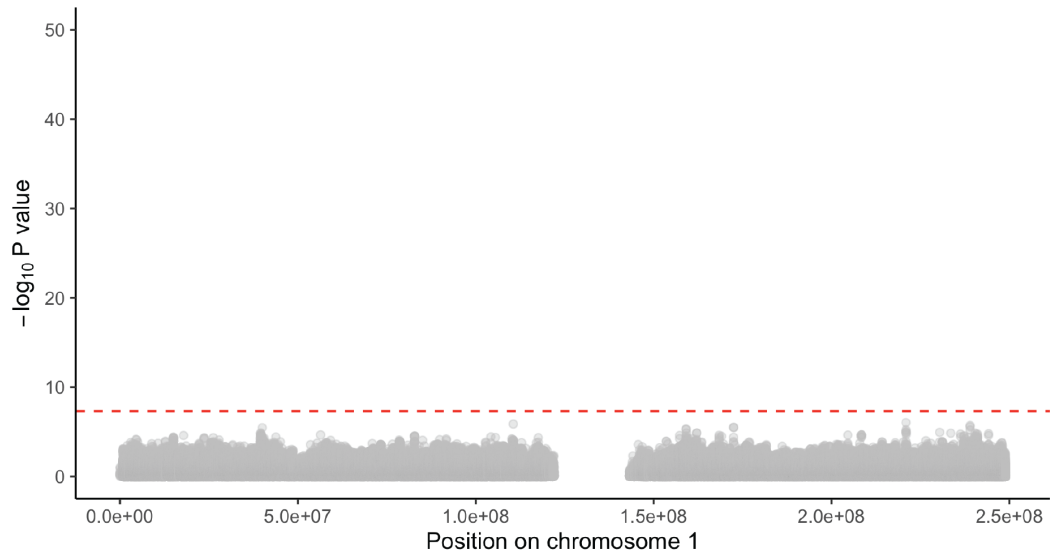

Figure S1: Manhattan plot of GWAS on rmtCN (A) before and (B) after correction for blood cell counts in the AFR cohort. Only chromosome 1 is displayed.

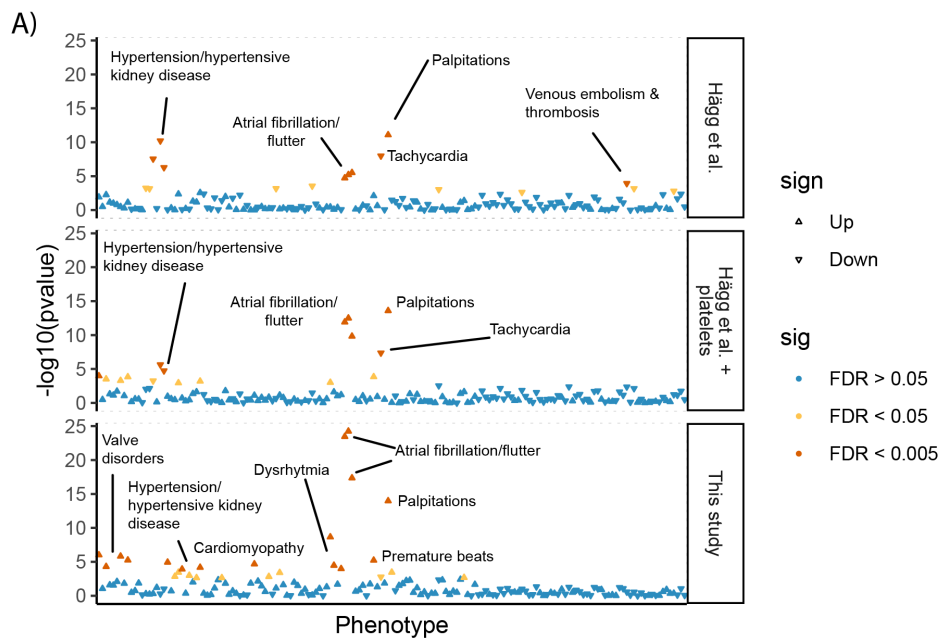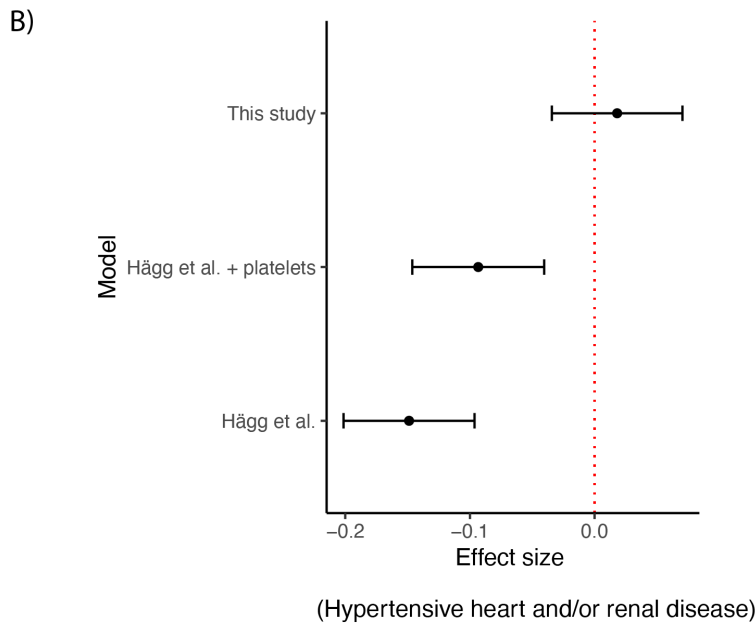

Figure S2: Sensitivity of association of mtDNA copy number with cardiac phenotypes to model choice. (A) The x-axis shows phenotypes arranged in order of phecode number such that similar phenotypes cluster together, and the y-axis shows the negative log of the association p-value. (Top panel) A model closely mimicking that used by Hägg *et al.* where, in addition to lrmtCN, we include sex, age, age<sup>2</sup>, neutrophil %, lymphocyte %, total white blood cell count, and 20 PCs as predictors. (Middel panel) The same as previous model except for the addition of platelet count as a covariate. (Bottom panel) The model used in this study where we use rlrmtCN (residuals from the model described in the main text), sex, age, and age<sup>2</sup>, and 20 PCs as predictors. (B) Forest plot illustrating the change in effect size for one phenotype (hypertension and renal disease) in the EUR cohort.



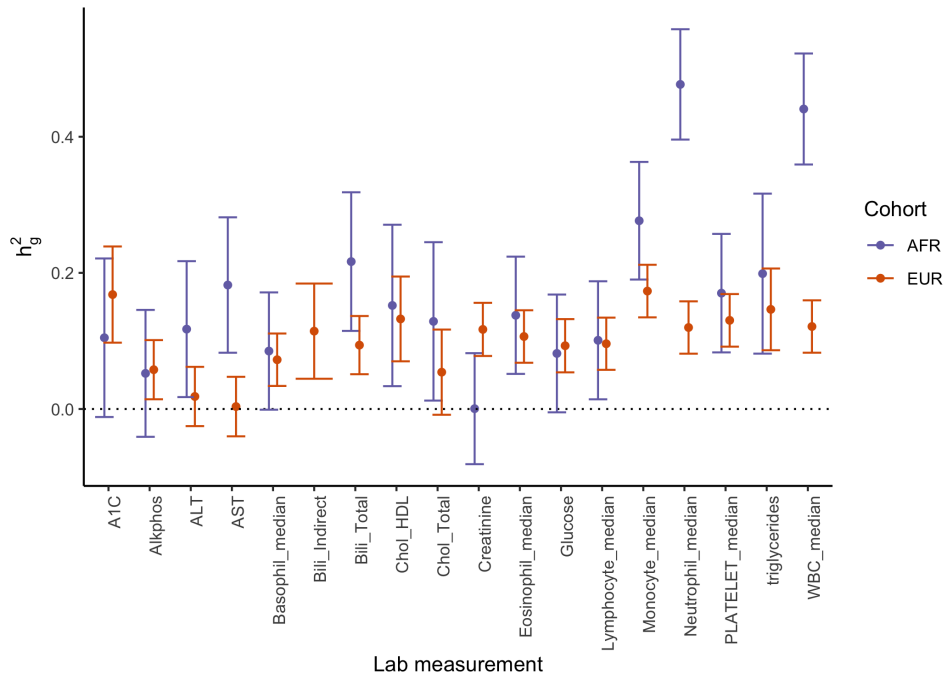

Figure S3: The heritability of lab measurements in the PMBB shown separately for the AFR and EUR cohort. Only lab measurements where the lower bound of the 95% CI was greater than 0 in at least in one of the cohorts is shown

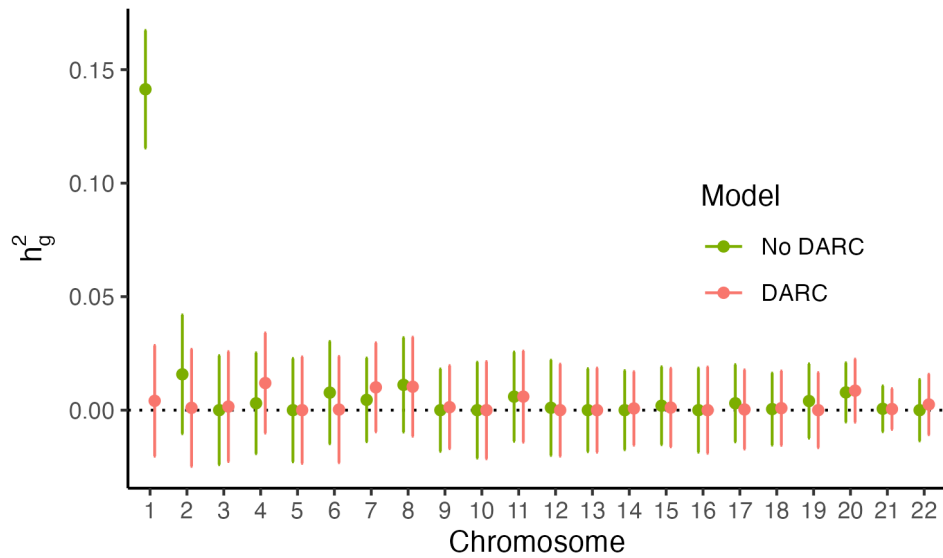

Figure S4: Heritability of neutrophil count partitioned by chromosome in the AFR cohort. The colors represent two models with and without genotype at the Duffy-null allele as a covariate. Both models included sex, age, age<sup>2</sup>, and 20 PCs as covariates.

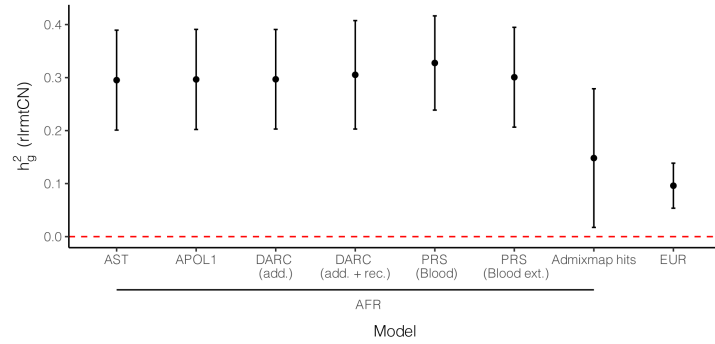

Figure S5: SNP heritability of rlrmtCN in the AFR (first 7 columns) and EUR (last columns) cohorts estimated using GCTA. All models included 20 genetic PCs calculated separately in each cohort. For the AFR cohort, the heritability was estimated with additional covariates: AST = amino aspartate transferase levels; APOL1 = genotype at the APOL1 locus; DARC (add.) = genotype at the rs2814778 SNP coded additively; DARC (add. + rec.) = additive and recessive coding for rs2814778; PRS (Blood) = polygenic risk scores for blood counts which were measured in the PMBB; PRS (Blood ext.) polygenic risk scores for an extended set of blood traits (see Methods for details).

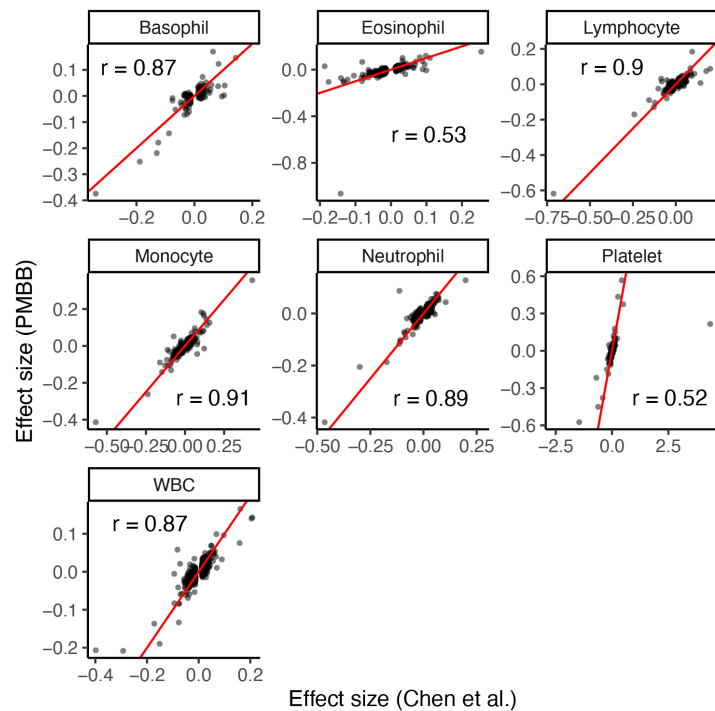

Figure S6: Effect sizes for variants discovered in Chen *et al.* [28] are correlated with their effects estimated in the PMBB EUR cohort. The red line represents  $y = x$ . The effects could only be re-estimated for traits which were available in the PMBB. One variant which can be seen as having a large effect size on platelet counts as estimated by Chen *et al.* was removed (see Methods for more details). The numbers in each plot show the correlation coefficients.

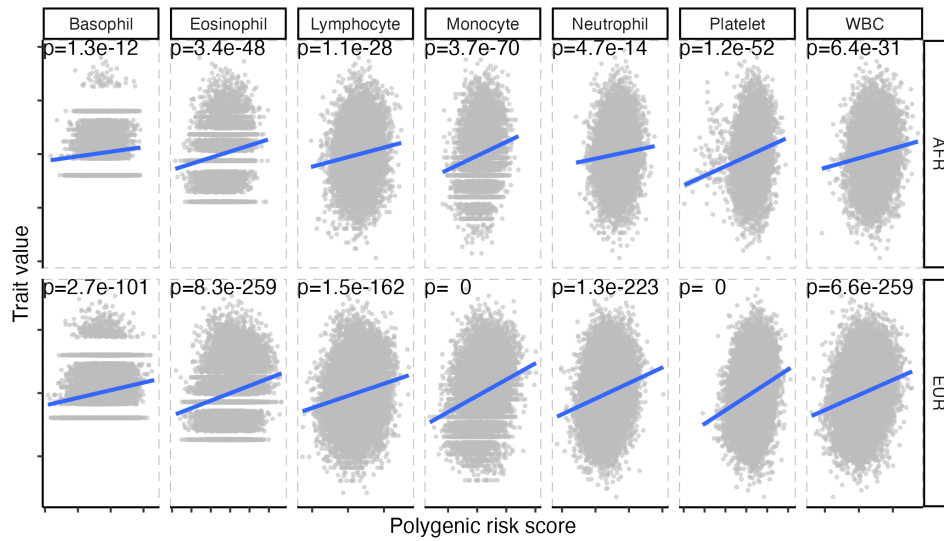

Figure S7: Polygenic risk scores (PRS) constructed using effects from Chen *et al.* [28] are strongly correlated with the actual phenotypes in both PMBB cohorts. The blue line represents the linear regression line.

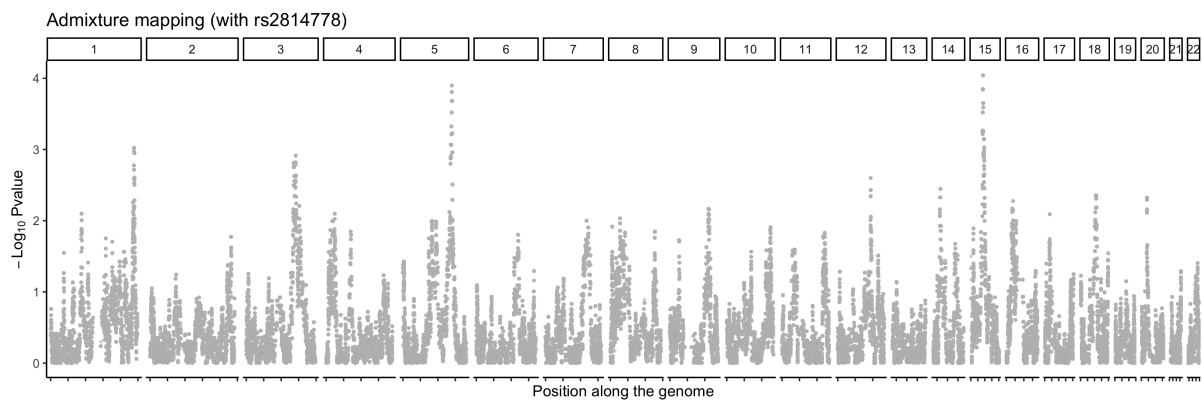

Figure S8: Admixture mapping of rlrmtCN in the AFR cohort. The x-axis shows the position along the genome and the y-axis shows the  $-\log_{10}$  of the p-value of association between local ancestry at each position and rlrmtCN. Global ancestry proportion and the Duffy-null genotype were included as covariates.

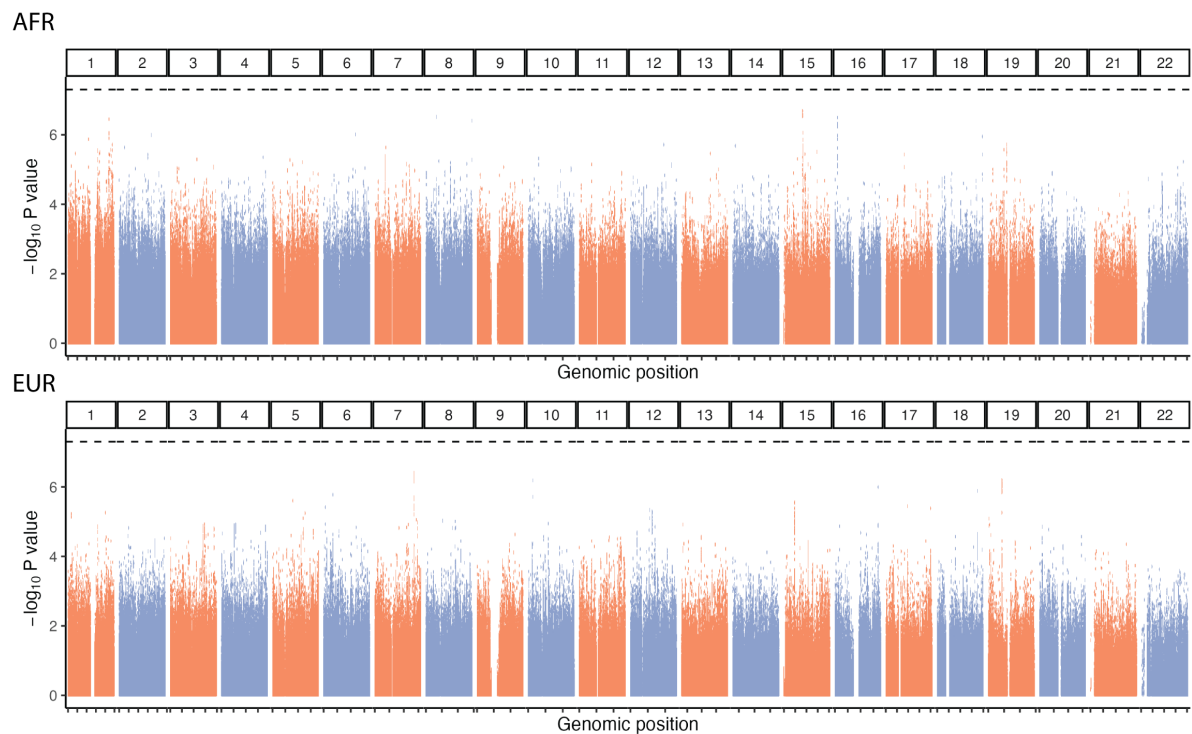

Figure S9: GWAS of mtDNA copy number (rlrmtCN) carried out separately in the AFR and EUR cohorts. The x-axis shows the genomic position, grouped by chromosomes (vertical panels) and the y-axis shows the  $-\log_{10}$  of the association p-value. The dotted horizontal line represents the genome-wide significance threshold of  $5 \times 10^{-08}$ . The first 20 PCs, computed separately within each cohort, were included as covariates.

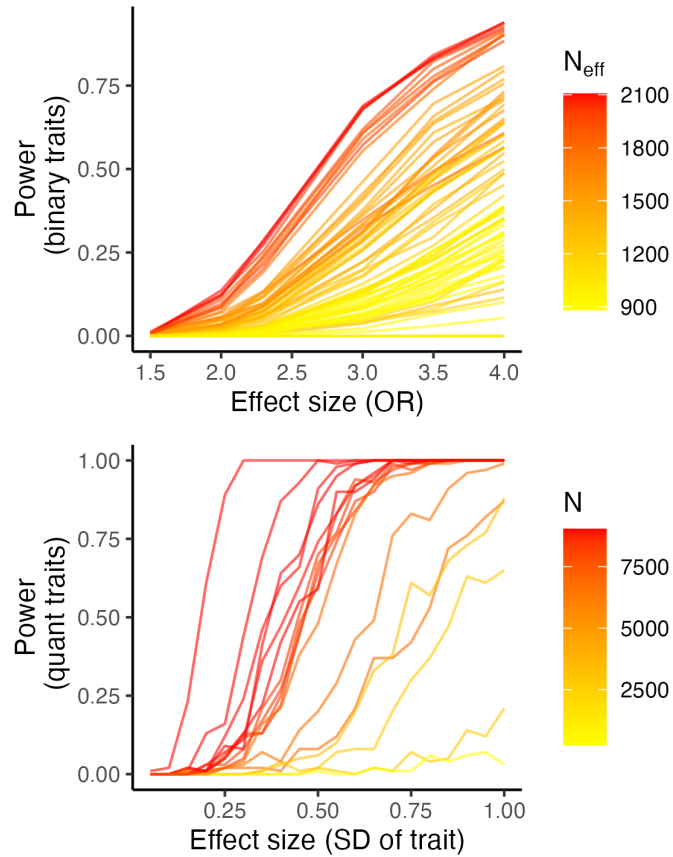

Figure S10: Power to detect a significant interaction effect between mitochondrial and nuclear ancestry for binary traits (case/control data) and quantitative traits (e.g. lab measurements). The x-axis lists the effect size, i.e., odds ratio (OR) or in units of standard deviation, for binary and quantitative traits, respectively and the y-axis shows the power of detecting an interaction effect at  $\alpha = 5 \times 10^{-05}$ . For quantitative traits, the color represents the sample size and for binary traits, it represents the effective sample size ( $N_{\text{eff}}$ ):  $n\phi(1 - \phi)$  where  $\phi$  is the proportion of cases and  $n$  is the sample size.

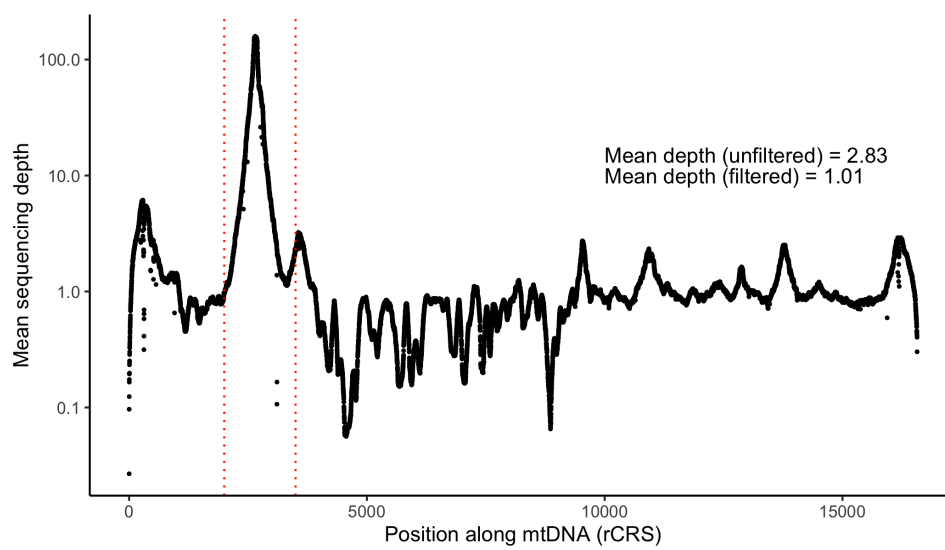

Figure S11: Mean sequencing depth (across individuals in the PMBB) of off-target reads aligning to the Revised Cambridge Reference Sequence (rCRS) of human mtDNA. Note that the y-axis is on a log-scale. Depth values from the region between the dotted red lines were filtered out for subsequent analysis.
